# Supplementary material
Source: MDPI journal article supplement (https://www.mdpi.com/2076-3417/13/4/2477)
Supplement: s1 [file s1]

## Supplementary Materials

### UHPLC-QTOF/MS Untargeted lipidomics and caffeine carry-over in milk of goats under spent coffee ground enriched diet

Casula et al.

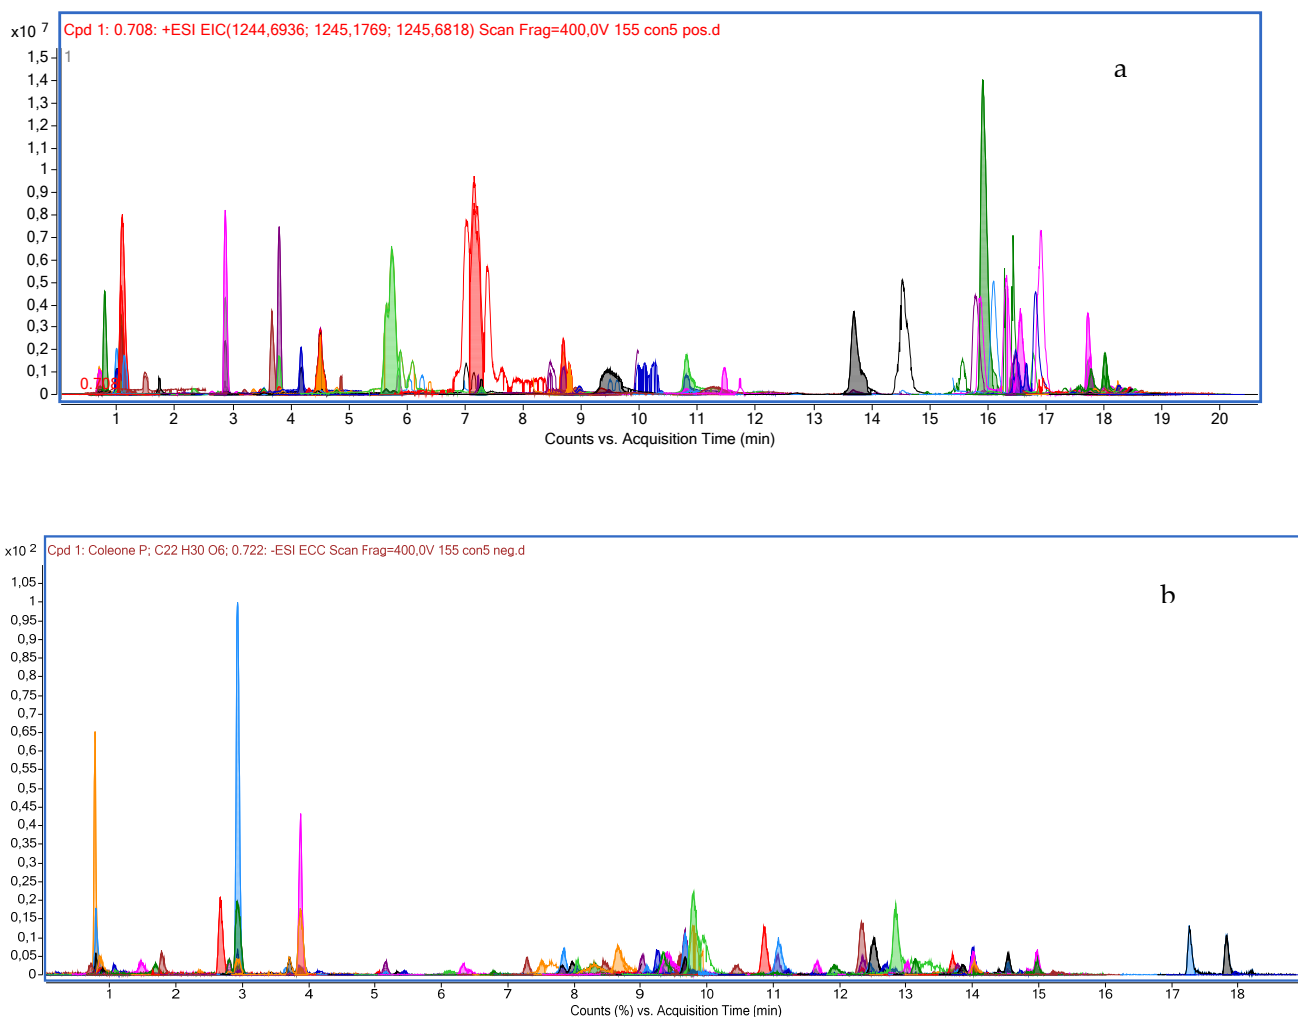

**Figure S1.** Extracted Ion Chromatograms of Milk sample obtained in the positive (a) and negative (b) ionization mode by UHPLC-QTOF/MS.
